# Supplementary material for: Multi-resistive pulse sensor microfluidic device
Source: Royal Society of Chemistry journal article supplement (doi:10.1039/d2an00128d), 2022-01-01
Supplement: d2an00128d1.pdf [file d2an00128d1.pdf]

## Supporting Information

### Multi-Resistive Pulse Sensor Microfluidic Device

Marcus Pollard,<sup>1</sup> Rushabh Maugi,<sup>1</sup> Mark Platt<sup>1\*</sup>

1 – School of Science, Loughborough University. Epinal Way. LE11 3TU

\* Corresponding author [m.platt@lboro.ac.uk](mailto:m.platt@lboro.ac.uk)

#### Table of Contents

|                                                                           |     |
|---------------------------------------------------------------------------|-----|
| <b>Figure S1.</b> Examples of the fluidic chip holder                     | PS2 |
| <b>Figure S2.</b> Examples of 110nm particles through sensor 2            | PS3 |
| <b>Table S1.</b> Summary of data sets obtained in the setup of the device | PS4 |

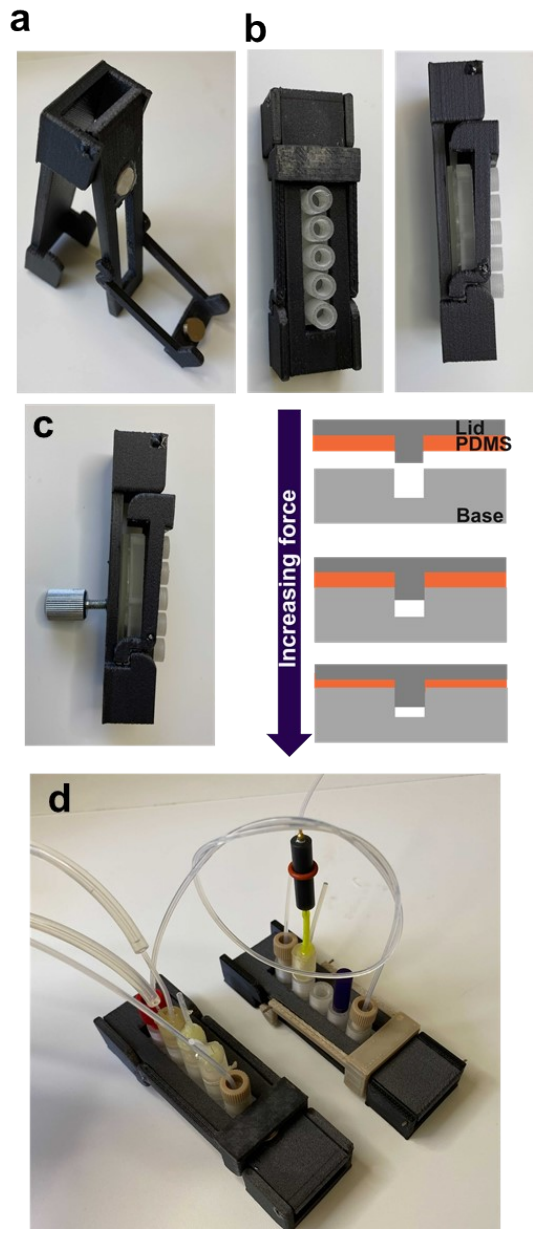

**Figure S1.** Examples of the fluidic chip holder a) empty and b) with the fluidic chip. c) Side image of holder with the screw thread; turning the screw compresses the lid and PDMS into the channel. d) The fluidic chips can be coupled in series or to other sensors and devices.

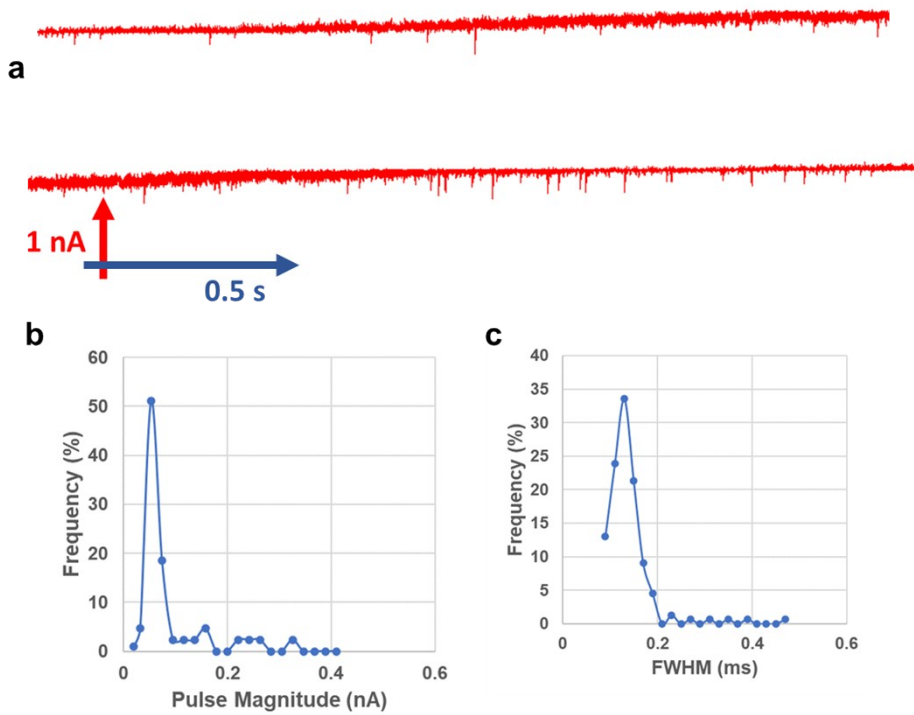

**Figure S2** a) Current time trace of sensor 2 1.8V, using a 580 nm pore size in a GNM, b) Distribution of blockade heights from sensor 2. 110 nm particles at  $1 \times 10^{10}$  particles/mL. Flow rate of 0.5mL/ min through sensor 1.

| Sensor 1                  |       |                    |                  |             |                              |                    |                                     |                            |
|---------------------------|-------|--------------------|------------------|-------------|------------------------------|--------------------|-------------------------------------|----------------------------|
|                           |       | Particle size (µm) | Electrolyte (mM) | Voltage (V) | Average Pulse magnitude (nA) | Particle rate /min | Flow rate through sensor 1 (mL/min) | Particle concentration /mL |
| Day 1                     | Run 1 | 10                 | 50               | 0.3         | 1.56                         | 482                | 0.5                                 | 1000                       |
|                           | Run 2 | 10                 | 50               | 0.3         | 1.48                         | 510                | 0.5                                 | 1000                       |
|                           | Run 3 | 10                 | 50               | 0.3         | 1.52                         | 496                | 0.5                                 | 1000                       |
| Day 2                     | Run 1 | 10                 | 50               | 0.3         | 1.42                         | 504                | 0.5                                 | 1000                       |
|                           | Run 2 | 10                 | 50               | 0.3         | 1.45                         | 501                | 0.5                                 | 1000                       |
|                           | Run 3 | 10                 | 50               | 0.3         | 1.39                         | 498                | 0.5                                 | 1000                       |
| Day 3                     | Run 1 | 10                 | 50               | 0.3         | 1.62                         | 482                | 0.5                                 | 1000                       |
|                           | Run 2 | 10                 | 50               | 0.3         | 1.58                         | 493                | 0.5                                 | 1000                       |
|                           | Run 3 | 10                 | 50               | 0.3         | 1.54                         | 499                | 0.5                                 | 1000                       |
| Sensor 2                  |       |                    |                  |             |                              |                    |                                     |                            |
| Nominal Pore size 5000 nm |       |                    |                  |             |                              |                    |                                     |                            |
|                           |       | Particle size (µm) | Electrolyte (mM) | Voltage (V) | Average Pulse magnitude (nA) | Particle rate /min | Flow rate through sensor 1 (mL/min) | Particle concentration /mL |
| Day 1                     | Run 1 | 1                  | 50               | 0.8         | 0.809                        | 374                | 0.5                                 | 1.00E+06                   |
|                           | Run 2 | 1                  | 50               | 0.8         | 0.81                         | 368                | 0.5                                 | 1.00E+06                   |
|                           | Run 3 | 1                  | 50               | 0.8         | 0.795                        | 371                | 0.5                                 | 1.00E+06                   |
| Day 2                     | Run 1 | 1                  | 50               | 0.8         | 0.801                        | 373                | 0.5                                 | 1.00E+06                   |
|                           | Run 2 | 1                  | 50               | 0.8         | 0.812                        | 380                | 0.5                                 | 1.00E+06                   |
|                           | Run 3 | 1                  | 50               | 0.8         | 0.8                          | 369                | 0.5                                 | 1.00E+06                   |
| Nominal Pore size 1000 nm |       |                    |                  |             |                              |                    |                                     |                            |
|                           |       | Particle size (µm) | Electrolyte (mM) | Voltage (V) | Average Pulse magnitude (nA) | Particle rate /min | Flow rate through sensor 1 (mL/min) | Particle concentration /mL |
| Day 1                     | Run 1 | 0.4                | 50               | 1.92        | 0.22                         | 4393               | 0.5                                 | 1.00E+09                   |
|                           | Run 2 | 0.4                | 50               | 1.92        | 0.22                         | 4280               | 0.5                                 | 1.00E+09                   |
|                           | Run 3 | 0.4                | 50               | 1.92        | 0.21                         | 4385               | 0.5                                 | 1.00E+09                   |
| Day 2                     | Run 1 | 0.4                | 50               | 1.92        | 0.23                         | 4356               | 0.5                                 | 1.00E+09                   |
|                           | Run 2 | 0.4                | 50               | 1.92        | 0.22                         | 4367               | 0.5                                 | 1.00E+09                   |
|                           | Run 3 | 0.4                | 50               | 1.92        | 0.24                         | 4398               | 0.5                                 | 1.00E+09                   |
| Nominal Pore size 780 nm  |       |                    |                  |             |                              |                    |                                     |                            |
|                           |       | Particle size (µm) | Electrolyte (mM) | Voltage (V) | Average Pulse magnitude (nA) | Particle rate /min | Flow rate through sensor 1 (mL/min) | Particle concentration /mL |
| Day 1                     | Run 1 | 0.21               | 50               | 1.6         | 0.4                          | 262                | 0.5                                 | 1.00E+08                   |
|                           | Run 2 | 0.21               | 50               | 1.6         | 0.39                         | 257                | 0.5                                 | 1.00E+08                   |
|                           | Run 3 | 0.21               | 50               | 1.6         | 0.4                          | 281                | 0.5                                 | 1.00E+08                   |
| Day 2                     | Run 1 | 0.21               | 50               | 1.6         | 0.42                         | 276                | 0.5                                 | 1.00E+08                   |
|                           | Run 2 | 0.21               | 50               | 1.6         | 0.4                          | 256                | 0.5                                 | 1.00E+08                   |
|                           | Run 3 | 0.21               | 50               | 1.6         | 0.41                         | 262                | 0.5                                 | 1.00E+08                   |
| Nominal Pore size 580 nm  |       |                    |                  |             |                              |                    |                                     |                            |
|                           |       | Particle size (µm) | Electrolyte (mM) | Voltage (V) | Average Pulse magnitude (nA) | Particle rate /min | Flow rate through sensor 1 (mL/min) | Particle concentration /mL |
| Day 1                     | Run 1 | 0.11               | 50               | 1.8         | 0.53                         | 376                | 0.5                                 | 1.00E+10                   |
|                           | Run 2 | 0.11               | 50               | 1.8         | 0.54                         | 354                | 0.5                                 | 1.00E+10                   |
|                           | Run 3 | 0.11               | 50               | 1.8         | 0.53                         | 357                | 0.5                                 | 1.00E+10                   |
| Day 2                     | Run 1 | 0.11               | 50               | 1.8         | 0.58                         | 381                | 0.5                                 | 1.00E+10                   |
|                           | Run 2 | 0.11               | 50               | 1.8         | 0.6                          | 387                | 0.5                                 | 1.00E+10                   |
|                           | Run 3 | 0.11               | 50               | 1.8         | 0.58                         | 382                | 0.5                                 | 1.00E+10                   |

Table S1. Example data parameters for runs using Sensor 1 and 2. The 5000nm sensor 2 was a pulled glass pipette. The 1000, 780 and 550 nm sensor 2 a GNM.
